# Supplementary material
Source: Research Square preprint supplement (doi:10.21203/rs.3.rs-9850622/v1)
Supplement: Supplementary file 1 [file 0ec725342c9516f79a1157cd.docx]

Table 2: Various applications of Machine Learning on Post-Harvest Loss Reduction across the Supply Chain

| **Type of Fruit** | **Supply Chain Process** | **Machine Learning Techniques** | | | **Ways Post-Harvest Loss is Minimized** | **Case Scenarios** | **Key Reference(s)** | |
| --- | --- | --- | --- | --- | --- | --- | --- | --- |
| Mango | Growing stage | Convolutional Neural Network, Bidirectional Long Short-Term Memory, and Deep Learning | | | Predicts optimal harvest time | Disease and early ripeness detection. | He et al., 2025 | |
| Multiple Fruits | Harvest stage | | Stacking and hybrid ensembles (RF, SVR, k-Nearest Neighbor, Artificial Neural Network) | Enhance harvest accuracy, minimize physiological damage, and early spoilage detection | | Enhance harvest timing | | Kayaalp, 2024; Upadhyay & Bhargava, 2025 | |
| Avocado, Apple and fresh dates | Post-Harvest, Sorting and Grading | Random Forest, XGBoost, Gradient Boost, Voting Ensembles | | | Non-destructive grading reduces the mixing of ripe and unripe fruits | Ripeness detection and quality prediction | Tipauksorn et al., 2025; Kumar & Agrawal, 2024 | |
| Tomatoes, Bananas, Dates | Storage (cold/controlled atmosphere) | SVR, XGB, RF, Recurrent Neural Network, Artificial Neural Network | | | Optimizes environmental parameters and extends shelf-life | Optimal storage condition (4°C, 80% humidity) | El-Mesery et al., 2024; Mohammed et al., 2023 | |
| Banana | Cold Chain Transportation | CatBoost, Decision Tree (temperature sensors) | | | Real-time monitoring prevents unsteady environmental variation | Monitoring of maturity | M & Voola, 2025; Olawale et al., 2025 | |
| Valencia oranges | Transportation and Logistics | Regression and ML models Support Vector Machine, Random Forest, XGBoost) | | | Predicts quality and shelf-life | Optimized logistics | Owoyemi et al., 2022 | |
| Strawberries (VOC) | Storage monitoring | Random Forest, Support Vector Machine and Neural networks Models | | | Predicts freshness | Quality optimization | Do et al., 2024; Tobler et al., 2024 | |
| Cassava | Processing and value addition | Random Forest, Optimized Relay Selection Method, and statistical tools | | | Predicts respiration and firmness to improve shelf-life decisions | Optimization via roasting | Mwape et al., 2025 | |
| Grapes and vegetables | Retail stage | Ensemble ML regression/classification | | | Enhance demand matching and reduce retail-level waste | Freshness and spoilage prediction | Dou et al., 2025; Priyadarshi et al., 2019 | |
