# Supplementary material
Source: Research Square preprint supplement (doi:10.21203/rs.3.rs-9850622/v1)
Supplement: Supplementary file 2 [file d614c1b4755da3d70f4a6344.docx]

**Supplementary Material: Appendix** **A**

The study screening process was based on clarity and consistency. All numerical values were carefully cross-checked to ensure alignment between the manuscript text and the PRISMA flow diagram. The updated description is provided in Section 2.1, and the revised PRISMA diagram is presented in Figure 1.

The complete database search strings have been included in the reviewed manuscript, section 2.2 and detailed in Appendix A.

Also, the reference list has been thoroughly reviewed and revised to ensure compliance with APA style guidelines. All inconsistencies, including duplicate DOI entries and journal details have been corrected throughout the manuscript.

**Appendix A**

**Scopus search string:**

TITLE-ABS-KEY ((“perishable food” OR “Fruits and Vegies”)

AND

(“machine learning” OR AI)

AND

(“post-harvest management” OR “post-harvest technology” OR “post-harvest loss reduction”

OR “post-harvest handling”)).

**Web of Science search string:**

TS=(("machine learning" OR ML OR "artificial intelligence")

AND

("post-harvest management" OR "post-harvest loss")

AND

("fruits" OR "vegetables" OR “perishable foods”)

AND

("supply chain" OR sustainability))

**Science Direct:**

("machine learning" OR "artificial intelligence")

AND

("post-harvest management" OR "post-harvest loss")

AND

("fruits" OR "vegetables" OR “perishable foods”)

AND

("supply chain" OR sustainability)

**Google Scholar**

1. “machine learning” AND “post-harvest management” AND fruits
2. "post-harvest loss" AND "fruit supply chain" AND machine learning
3. "post-harvest waste reduction" AND "perishable supply chain" AND machine learning

**IEEE Xplore**

("machine learning" OR ML)

AND

("post-harvest" OR "post-harvest loss")

AND

(fruits OR vegetables)

**SciSpace**

1. machine learning for post-harvest loss reduction in fruits
2. ML for postharvest waste reduction in fruits and vegetables
3. machine learning for post-harvest management in perishable foods

**Wiley Online Library**

(“machine learning” AND “post-harvest loss” AND perishable foods)

**PubMed**

(“machine learning” OR “artificial intelligence”)
AND
(“postharvest” OR “food loss” OR “food waste”)
AND
(“fruits” OR “vegetables” OR “perishable foods”)
